# Supplementary material
Source: publisher figshare collection journal article supplement (https://tandf.figshare.com/ndownloader/files/23114951)
Supplement: Supplementary file 1 [file 23114951]

Supporting Information

Table 1 Selected bond lengths (Å) and angles (o) of compound 1.

| Zn(1)-O(1) | 1.947(2) | Zn(1)-N(6)a | 1.992(3) |
| --- | --- | --- | --- |
| Zn(1)-N(5) | 2.005(3) | Zn(1)-O(2)b | 2.242(3) |
| Zn(1)-N(2) | 2.272(3) | Zn(2)-N(7)a | 2.092(3) |
| Zn(2)-N(7)c | 2.092(3) | Zn(2)-N(1) | 2.116(3) |
| Zn(2)-N(1)d | 2.116(3) | Zn(2)-O(3)d | 2.215(2) |
| Zn(2)-O(3) | 2.215(2) |  |  |
| O(1)-Zn(1)-N(6)a | 125.55(10) | O(1)-Zn(1)-N(5) | 123.13(10) |
| N(6)a-Zn(1)-N(5) | 111.26(11) | O(1)-Zn(1)-O(2)b | 91.60(9) |
| N(6)a-Zn(1)-O(2)b | 93.01(10) | N(5)-Zn(1)-O(2)b | 82.64(10) |
| O(1)-Zn(1)-N(2) | 91.89(11) | N(6)a-Zn(1)-N(2) | 93.72(11) |
| N(5)-Zn(1)-N(2) | 86.43(11) | O(2)b-Zn(1)-N(2) | 168.67(9) |
| N(7)a-Zn(2)-N(7)c | 180.0 | N(7)a-Zn(2)-N(1) | 90.13(11) |
| N(7)c-Zn(2)-N(1) | 89.87(11) | N(7)a-Zn(2)-N(1)d | 89.87(11) |
| N(7)c-Zn(2)-N(1)d | 90.13(11) | N(1)-Zn(2)-N(1)d | 180.000(1) |
| N(7)a-Zn(2)-O(3)d | 92.39(10) | N(7)c-Zn(2)-O(3)d | 87.61(10) |
| N(1)-Zn(2)-O(3)d | 90.53(10) | N(1)d-Zn(2)-O(3)d | 89.47(10) |
| N(7)a-Zn(2)-O(3) | 87.61(10) | N(7)c-Zn(2)-O(3) | 92.39(10) |
| N(1)-Zn(2)-O(3) | 89.47(10) | N(1)d-Zn(2)-O(3) | 90.53(10) |
| O(3)d-Zn(2)-O(3) | 180.000(1) |  |  |

Symmetry codes: (a) *x*, –*y* + 1/2, *z* + 1/2; (b) –*x* + 2, –*y*, –*z* + 2; (c) –*x*+1, *y* – 1/2, –*z* + 3/2; (d) –*x* + 1, –*y*, –*z* + 2.
